# Supplementary material
Source: publisher figshare collection journal article supplement (https://tandf.figshare.com/articles/dataset/_/14555776)
Supplement: Supplementary file 1 [file 1]

Archive with 10 entries (10 files):
- Figure S1(TIFF).tiff
- Figure S2(TIFF).tiff
- Figure S3(TIFF).tiff
- Figure S4(TIFF).tiff
- Figure S5(TIFF).tiff
- Supplementary_Figure_Legends_KRNB_2020_0772R1_KC.docx
- Table_S1.docx
- Table_S2.docx
- Table_S3.pdf
- Table_S4.pdf
