# Supplementary material
Source: publisher figshare collection journal article supplement (https://tandf.figshare.com/articles/dataset/_/14555776)
Supplement: Supplementary file 1 [file 1 › Supplementary_Figure_Legends_KRNB_2020_0772R1_KC.docx]

**Supplementary Figures:**

**Supplementary Figure 1**: (A) Correlation scatter plots between the biological replicates of the three time point collections of *P. falciparum* after normalization of gene counts by sequencing depth (“REC”) (see Materials and Methods). The x-axis shows the normalized gene counts for replicates sequenced on HiSeq 2500 while the y-axis shows the normalized gene counts for replicates sequenced on NextSeq500. The axes are plotted in log10 scale and a pseudo count of one (1) is added to all gene counts. The plots show all coding and non-coding genes (5386 genes). Both tRNA and rRNA reads were discarded prior to analysis. The genes are colored by type as indicated: *black*: mRNA; *blue*: ncRNA; *pink*: snoRNA; *green*: snRNA. Pearson correlation R2: 0.87, 0.63, 0.75 respectively. (B) Distribution of uniquely mapped reads across known coding regions on all 14 chromosomes by developmental state; *red:* Ring; *blue:* Trophozoite; *green:* Schizont (C) Distribution of uniquely mapped reads across various annotated coding and non-coding regions of *P.falciparum* genome. The relative percentage of reads from forward stranded reads across various gene categories are shown on top and reads from reverse stranded reads are shown on the bottom. The bars denote average percentage of reads across biological replicates and the error bars show standard deviation.

**Supplementary Figure 2**: Distribution of uniquely mapped reads representing annotated non-coding transcripts in the *P. falciparum* genome. Reads mapping to tRNA and rRNA genes were not included in this analysis. The x-axis shows the 14 chromosomes of *P. falciparum* and the y-axis on the left shows the relative percentage of non-coding reads (percent expression) across each of the chromosomes. The error bars represent the standard deviation of the two replicates of the same stage. The y-axis on the right represents the number of known non-coding genes that include ncRNA, snoRNA and snRNAs annotated on each chromosome (Chappell et al. 2020). This is shown by the black dots and line on the plot. Colors represent the stage *red*: Ring; *blue*: Trophozoite; *green*: Schizont

**Supplementary Figure 3:** Duplex RNA-seq data for snoR15. (A) Secondary structure of the *PfsnoR15* based on *in vitro* chemical probing (data not shown) of the mix stage RNA using NAI (B) IGV screenshot of the *snoR15* peaks representing duplex RNA-seq read enrichments in three different *P. falciparum* RBC stages.

**Supplementary Figure 4:** (A-B) Scatter plots for Trophozoite (A) and (B) Schizont stages showing correlation between normalized gene counts from mRNA-seq and Duplex RNA-seq datasets for Ring stage. A pseudo count of 1.0 is added to the normalized counts for both duplex and mRNA-seq data. The axes are in logarithmic scale. The color and size of the points show the ratio of the duplex RNA-seq normalized counts by the mRNA-seq normalized counts. Larger red points represent genes with higher expression in duplex RNA-seq compared to total mRNA-seq as shown in the legend. (C-D) Duplex RNA-seq counts corresponding to antisense reads for the top 50 antisense genes plotted against mRNA-seq counts for (C) Trophozoite and (D) Schizont stages. The size and color of the points indicate the ratio of the duplex RNA-seq antisense to sense counts. Larger red points indicate genes that have more antisense signal

than sense signal. Few selected genes with very high and very low ratios are highlighted. A pseudo count of one is added to the normalized counts and axes are in logarithmic scale.

**Supplementary Figure 5:** Distribution of duplex RNA-seq data across the top 5% structured (~200) splice junctions in *P. falciparum* of each developmental stage. Average normalized expression of the top 5% expressed spliced junctions, 50nt flanking the splice junctions is plotted. The values for the replicates for each stage are averaged for plotting (See Materials and Methods for details)
