# Supplementary material
Source: publisher figshare collection journal article supplement (https://tandf.figshare.com/articles/dataset/_/14555776)
Supplement: Supplementary file 1 [file 1 › Table_S1.docx]

**Table S1:** HPLC purified3’ Biotinylated oligos (3Bio) used for the depletion of *Plasmodium falciparum* ribosomal RNA (rRNA) species.

| ***Plasmodium falciparum* rRNA** | **Biotinylated oligos** | **Melting temperature (Tm)** |
| --- | --- | --- |
| 5S rRNA | TGACTCGTTCATACTACAGTGGCCA/3Bio/ | 59.4°C |
| 5.8S rRNA | CCAAGACATCCATCGTTAAGACTGTGC/3Bio/ | 59.4°C |
| 18S rRNA | TGTACTTTCACTTGCATGGCTTAATCTGTG/3Bio/ | 59.1°C |
| 28S rRNA | CCTTCTTCACTCGCCGTTACTAAAGG/3Bio/ | 59.0°C |
