# Supplementary material
Source: publisher figshare collection journal article supplement (https://tandf.figshare.com/articles/dataset/_/14555776)
Supplement: Supplementary file 1 [file 1 › Table_S2.docx]

**Table S2**. Summary of sequence reads obtained from duplex RNA seq libraries. The %total bases Q>=30 and GC content are calculated post-trimming adapter sequences.

| Library | Read length | Total reads | %Total Bases Q≥30 | GC Content (%) | Median Insert Size |
| --- | --- | --- | --- | --- | --- |
| *Duplex RNA-seq-1* | | | | | |
| Ring | 125X2 | 67,970,256 | 75.89 | 42.25 | 45 |
| Trophozoite | 125X2 | 17,691,860 | 75.03 | 42.82 | 49 |
| Schizont | 105X2 | 10,201,818 | 81.45 | 43.43 | 45 |
| *Duplex RNA-seq-2* | | | | | |
| Ring | 75X2 | 178,562,120 | 88.76 | 51.49 | 30 |
| Trophozoite | 75X2 | 437,153,310 | 88.32 | 50.41 | 33 |
| Schizont | 75X2 | 224,498,038 | 89.64 | 51.27 | 30 |
