# Supplementary material
Source: publisher figshare collection journal article supplement (https://tandf.figshare.com/articles/dataset/_/14555776)
Supplement: Supplementary file 1 [file 1 › Table_S3.pdf]

**Table S3** Normalized gene counts of 73 highly base-paired segments of known, conserved structural RNAs

| Gene          | GeneType | Ring Replicate | Ring Replicate | Trophozoite R | Trophozoite R | Schizont Rep | Schizont Rep | Average   |
|---------------|----------|----------------|----------------|---------------|---------------|--------------|--------------|-----------|
| PF3D7_1418800 | ncRNA    | 234564.23      | 136722.93      | 828810.50     | 455948.14     | 221959.70    | 133108.54    | 335185.67 |
| PF3D7_1213100 | snRNA    | 81252.92       | 33711.32       | 208307.64     | 101793.57     | 135634.23    | 34747.31     | 99241.17  |
| PF3D7_1137000 | snRNA    | 51065.79       | 31306.55       | 193819.90     | 114183.66     | 122142.25    | 31934.64     | 90742.13  |
| PF3D7_1244300 | snoRNA   | 47740.37       | 21830.53       | 172635.24     | 79335.42      | 50379.06     | 20534.10     | 65409.12  |
| PF3D7_1341100 | snRNA    | 5704.78        | 24458.35       | 22773.52      | 87886.71      | 5646.71      | 24640.64     | 28518.45  |
| PF3D7_1424900 | snoRNA   | 4352.35        | 1950.79        | 107670.57     | 12136.38      | 5930.84      | 1940.23      | 22330.19  |
| PF3D7_1446000 | snRNA    | 6824.10        | 19245.38       | 13755.18      | 39836.49      | 11309.98     | 18072.34     | 18173.91  |
| PF3D7_0308400 | snRNA    | 6545.85        | 15246.26       | 15591.52      | 46321.65      | 8766.61      | 15011.14     | 17913.84  |
| PF3D7_0510900 | snoRNA   | 6076.49        | 12998.20       | 15522.22      | 33053.49      | 6675.65      | 13119.25     | 14574.21  |
| PF3D7_1109000 | snoRNA   | 3264.52        | 2664.40        | 38622.42      | 9447.00       | 4154.35      | 2568.97      | 10120.28  |
| PF3D7_1341400 | snoRNA   | 4159.67        | 2271.02        | 36701.94      | 8782.93       | 5376.38      | 2472.00      | 9960.66   |
| PF3D7_1424500 | snoRNA   | 4460.50        | 8771.37        | 9369.76       | 18822.31      | 3666.09      | 6799.49      | 8648.25   |
| PF3D7_1424600 | snoRNA   | 4531.38        | 443.59         | 37083.07      | 1124.07       | 4482.61      | 528.64       | 8032.22   |
| PF3D7_1304800 | snoRNA   | 2153.07        | 3911.97        | 12007.94      | 9228.59       | 2783.36      | 3504.53      | 5598.25   |
| PF3D7_0707420 | snoRNA   | 3183.15        | 3815.51        | 6647.43       | 8918.62       | 5015.01      | 3643.30      | 5203.84   |
| PF3D7_0218800 | ncRNA    | 2273.83        | 2212.92        | 9171.77       | 8164.09       | 2248.20      | 2190.76      | 4376.93   |
| PF3D7_1109600 | snoRNA   | 707.72         | 1049.62        | 14854.02      | 4239.24       | 2711.64      | 1064.38      | 4104.44   |
| PF3D7_0826800 | snoRNA   | 1602.34        | 1306.74        | 11280.34      | 4674.97       | 2375.10      | 1688.85      | 3821.39   |
| PF3D7_0918500 | ncRNA    | 1494.18        | 1308.89        | 7003.81       | 6846.98       | 3315.75      | 1422.12      | 3565.29   |
| PF3D7_1328700 | ncRNA    | 958.15         | 3306.30        | 2326.35       | 8760.87       | 968.24       | 3338.75      | 3276.44   |
| PF3D7_0104900 | ncRNA    | 966.55         | 3097.59        | 3123.25       | 7239.69       | 1128.24      | 2843.38      | 3066.45   |
| PF3D7_1241000 | ncRNA    | 743.42         | 357.17         | 8919.34       | 5033.48       | 1001.35      | 479.44       | 2755.70   |
| PF3D7_1109300 | snoRNA   | 383.78         | 696.04         | 8949.04       | 4201.73       | 571.02       | 663.71       | 2577.55   |
| PF3D7_1109500 | snoRNA   | 2401.40        | 1028.83        | 5513.95       | 2074.94       | 3216.45      | 973.10       | 2534.78   |
| PF3D7_1424800 | ncRNA    | 1522.53        | 2120.41        | 2766.88       | 4310.94       | 1754.43      | 2050.85      | 2421.01   |
| PF3D7_1130310 | snoRNA   | 1551.93        | 1515.80        | 4553.71       | 3878.52       | 1199.96      | 1815.40      | 2419.22   |
| PF3D7_1421150 | snoRNA   | 1040.57        | 889.69         | 6800.87       | 3419.63       | 1362.71      | 675.94       | 2364.90   |
| PF3D7_0601800 | snoRNA   | 925.07         | 542.92         | 7365.14       | 3745.05       | 617.91       | 570.72       | 2294.47   |
| PF3D7_1423900 | snoRNA   | 717.69         | 532.52         | 5538.70       | 2168.71       | 1177.89      | 498.21       | 1772.29   |
| PF3D7_1425100 | snoRNA   | 764.42         | 973.96         | 2252.11       | 2667.31       | 1062.03      | 1021.44      | 1456.88   |
| PF3D7_0218900 | ncRNA    | 501.39         | 1413.96        | 1262.17       | 3057.81       | 626.19       | 1426.38      | 1381.32   |
| PF3D7_0804100 | snoRNA   | 550.74         | 1460.94        | 1707.64       | 3092.01       | 444.12       | 1006.94      | 1377.07   |
| PF3D7_1351500 | snoRNA   | 398.48         | 1014.48        | 1430.46       | 3563.03       | 300.68       | 1286.19      | 1332.22   |
| PF3D7_1424000 | snoRNA   | 547.59         | 935.23         | 3029.21       | 1771.59       | 623.43       | 913.10       | 1303.36   |
| PF3D7_1130300 | snoRNA   | 242.03         | 495.23         | 4316.13       | 1405.36       | 311.71       | 570.15       | 1223.44   |
| PF3D7_1424300 | snoRNA   | 695.64         | 759.87         | 1895.73       | 1705.40       | 1370.99      | 592.62       | 1170.04   |

|               |        |         |         |         |         |        |         |         |
|---------------|--------|---------|---------|---------|---------|--------|---------|---------|
| PF3D7_1331900 | snoRNA | 546.01  | 934.15  | 1682.89 | 2138.92 | 744.80 | 845.71  | 1148.75 |
| PF3D7_1402600 | snoRNA | 378.01  | 652.65  | 2029.37 | 2436.76 | 444.12 | 740.49  | 1113.57 |
| PF3D7_1424200 | snoRNA | 121.80  | 577.71  | 1851.18 | 2863.66 | 184.82 | 601.15  | 1033.39 |
| PF3D7_1109800 | snoRNA | 221.03  | 1236.81 | 608.81  | 2405.88 | 135.17 | 1453.97 | 1010.28 |
| PF3D7_0219000 | snoRNA | 230.48  | 291.54  | 3103.45 | 462.20  | 366.88 | 271.85  | 787.74  |
| PF3D7_1478900 | ncRNA  | 1218.03 | 500.61  | 994.89  | 686.13  | 526.88 | 522.38  | 741.49  |
| PF3D7_0709050 | snoRNA | 232.06  | 545.07  | 871.15  | 1288.43 | 463.43 | 541.43  | 656.93  |
| PF3D7_0307000 | snoRNA | 309.23  | 440.72  | 841.45  | 1440.66 | 391.71 | 323.89  | 624.61  |
| PF3D7_0309400 | snoRNA | 101.33  | 378.68  | 846.40  | 1586.27 | 140.69 | 623.90  | 612.88  |
| PF3D7_1309120 | ncRNA  | 322.36  | 376.17  | 796.90  | 808.58  | 491.02 | 528.64  | 553.94  |
| PF3D7_0803900 | snoRNA | 104.48  | 425.30  | 593.96  | 1266.37 | 201.37 | 424.84  | 502.72  |
| PF3D7_1210800 | snoRNA | 275.11  | 285.09  | 678.11  | 1004.93 | 231.72 | 366.55  | 473.58  |
| PF3D7_1424700 | snoRNA | 320.26  | 147.38  | 1286.92 | 283.50  | 424.81 | 137.92  | 433.47  |
| PF3D7_0804200 | ncRNA  | 255.68  | 469.41  | 331.63  | 729.15  | 226.20 | 529.77  | 423.64  |
| PF3D7_0626840 | ncRNA  | 185.33  | 457.22  | 292.03  | 678.41  | 231.72 | 600.30  | 407.50  |
| PF3D7_1425000 | ncRNA  | 87.15   | 234.88  | 212.84  | 742.39  | 132.41 | 247.68  | 276.23  |
| PF3D7_1222200 | snoRNA | 85.58   | 169.62  | 306.88  | 523.98  | 80.00  | 90.43   | 209.41  |
| PF3D7_0809000 | ncRNA  | 28.88   | 59.17   | 262.33  | 642.01  | 22.07  | 116.87  | 188.55  |
| PF3D7_1336500 | snoRNA | 71.40   | 196.87  | 311.83  | 275.78  | 74.48  | 184.55  | 185.82  |
| PF3D7_0712700 | ncRNA  | 68.78   | 17.93   | 806.80  | 162.16  | 27.59  | 15.64   | 183.15  |
| PF3D7_1330900 | snoRNA | 86.63   | 88.22   | 470.22  | 169.88  | 60.69  | 28.15   | 150.63  |
| PF3D7_0829900 | ncRNA  | 219.45  | 153.84  | 123.74  | 38.61   | 66.20  | 151.28  | 125.52  |
| PF3D7_0531500 | ncRNA  | 21.53   | 106.50  | 138.59  | 359.61  | 27.59  | 96.68   | 125.08  |
| PF3D7_0808500 | ncRNA  | 51.45   | 21.16   | 475.17  | 126.86  | 30.34  | 28.44   | 122.24  |
| PF3D7_0712100 | ncRNA  | 48.83   | 53.43   | 287.08  | 233.86  | 66.20  | 31.00   | 120.07  |
| PF3D7_0829800 | ncRNA  | 154.35  | 170.69  | 153.44  | 13.24   | 77.24  | 112.61  | 113.60  |
| PF3D7_0105000 | ncRNA  | 69.30   | 62.40   | 202.94  | 110.31  | 74.48  | 51.47   | 95.15   |
| PF3D7_0711800 | ncRNA  | 58.80   | 22.23   | 306.88  | 109.21  | 60.69  | 6.54    | 94.06   |
| PF3D7_0830100 | ncRNA  | 43.58   | 59.89   | 24.75   | 99.28   | 85.51  | 72.23   | 64.21   |
| PF3D7_0421400 | ncRNA  | 14.70   | 17.21   | 59.40   | 258.13  | 13.79  | 6.26    | 61.58   |
| PF3D7_1370500 | ncRNA  | 26.78   | 8.25    | 84.14   | 147.82  | 24.83  | 34.12   | 54.32   |
| PF3D7_0108900 | ncRNA  | 44.63   | 73.51   | 19.80   | 112.52  | 5.52   | 66.54   | 53.75   |
| PF3D7_1109700 | snoRNA | 7.35    | 41.96   | 49.50   | 168.78  | 11.03  | 40.10   | 53.12   |
| PF3D7_1421700 | ncRNA  | 4.73    | 50.92   | 9.90    | 156.64  | 0.00   | 79.62   | 50.30   |
| PF3D7_1363900 | ncRNA  | 24.68   | 28.69   | 44.55   | 110.31  | 60.69  | 27.58   | 49.42   |
| PF3D7_0731000 | ncRNA  | 31.50   | 77.46   | 14.85   | 43.02   | 5.52   | 76.21   | 41.43   |
| PF3D7_0809300 | ncRNA  | 26.78   | 16.14   | 24.75   | 0.00    | 68.96  | 28.72   | 27.56   |
