# Supplementary material
Source: publisher figshare collection journal article supplement (https://tandf.figshare.com/articles/dataset/_/14555776)
Supplement: Supplementary file 1 [file 1 › Table_S4.pdf]

**Table S4:** Previously unannotated genomic regions with potential novel RNA secondary structures

| Duplex RNA-seq Peak                                         | Comment                                                                                                                           |
|-------------------------------------------------------------|-----------------------------------------------------------------------------------------------------------------------------------|
| Pf3D7_01_v3:258,631-258,748 and Pf3D7_01_v3:258,782-258,887 | Duplex RNA-seq peaks indicating extended structures 0nt upstream of 5'UTR for PF3D7_0106000 in Ring and Schizont                  |
| Pf3D7_03_v3:464,568-464,636                                 | Duplex RNA-seq peaks indicating structures 30nt upstream of start codon for PF3D7_0310800                                         |
| Pf3D7_04_v3:1,058,173-1,058,308                             | Intergenic but might indicate structure 500nt upstream of 5'UTR of GAPM2                                                          |
| Pf3D7_05_v3:262,439-262,545                                 | Duplex RNA-seq peaks indicating structures 140nt upstream of start codon for PF3D7_0506300 in Ring                                |
| Pf3D7_06_v3:488,290-488,382                                 | Duplex RNA-seq peaks indicating structures 32nt downstream of 3'UTR codon for PF3D7_0611700 in all Ring, Trophozoite and Schizont |
| Pf3D7_06_v3:915,533-915,629                                 | Duplex RNA-seq peaks indicating structures 70nt downstream of 3'UTR codon for PF3D7_0622600 in all Ring, Trophozoite and Schizont |
| Pf3D7_06_v3:1,302,317-1,307,679                             | Novel Intergenic structures (Low expression)                                                                                      |
| Pf3D7_07_v3:1,293,861-1,296,942                             | 10+ peaks spanning 3kB in all three stages immediately upstream of ApiAp2 (PF3D7_0730300)                                         |
| Pf3D7_08_v3:474,482-474,586                                 | Duplex RNA-seq peaks indicating structures 110nt downstream of stop codon for PF3D7_0809250 in all Ring and Schizont              |
| Pf3D7_08_v3:474,712-474,788                                 | Extended 3'UTR of PF3D7_0809250 in Ring and Schizont                                                                              |
| Pf3D7_08_v3:841,026-841,128                                 | Duplex RNA-seq peaks indicating structures 135nt upstream of start codon for PF3D7_0818500 in all three stages                    |
| Pf3D7_08_v3:948,100-948,229                                 | Duplex RNA-seq peaks indicating structures 210nt upstream of start codon for PF3D7_0821000 in all three stages                    |
| Pf3D7_09_v3:325,233-326,744                                 | Novel Intergenic structures between PF3D7_0906600 and PF3D7_0906700                                                               |
| Pf3D7_10_v3:1,010,283-1,010,837                             | ~3 peaks might indicate structures 275nt upstream of start codon for CHD1 in all three stages                                     |
| Pf3D7_11_v3:759,822-760,022                                 | Novel Intronic structures in PF3D7_1120000                                                                                        |
