# Supplementary material
Source: publisher figshare collection journal article supplement (https://tandf.figshare.com/articles/dataset/_/14555776)

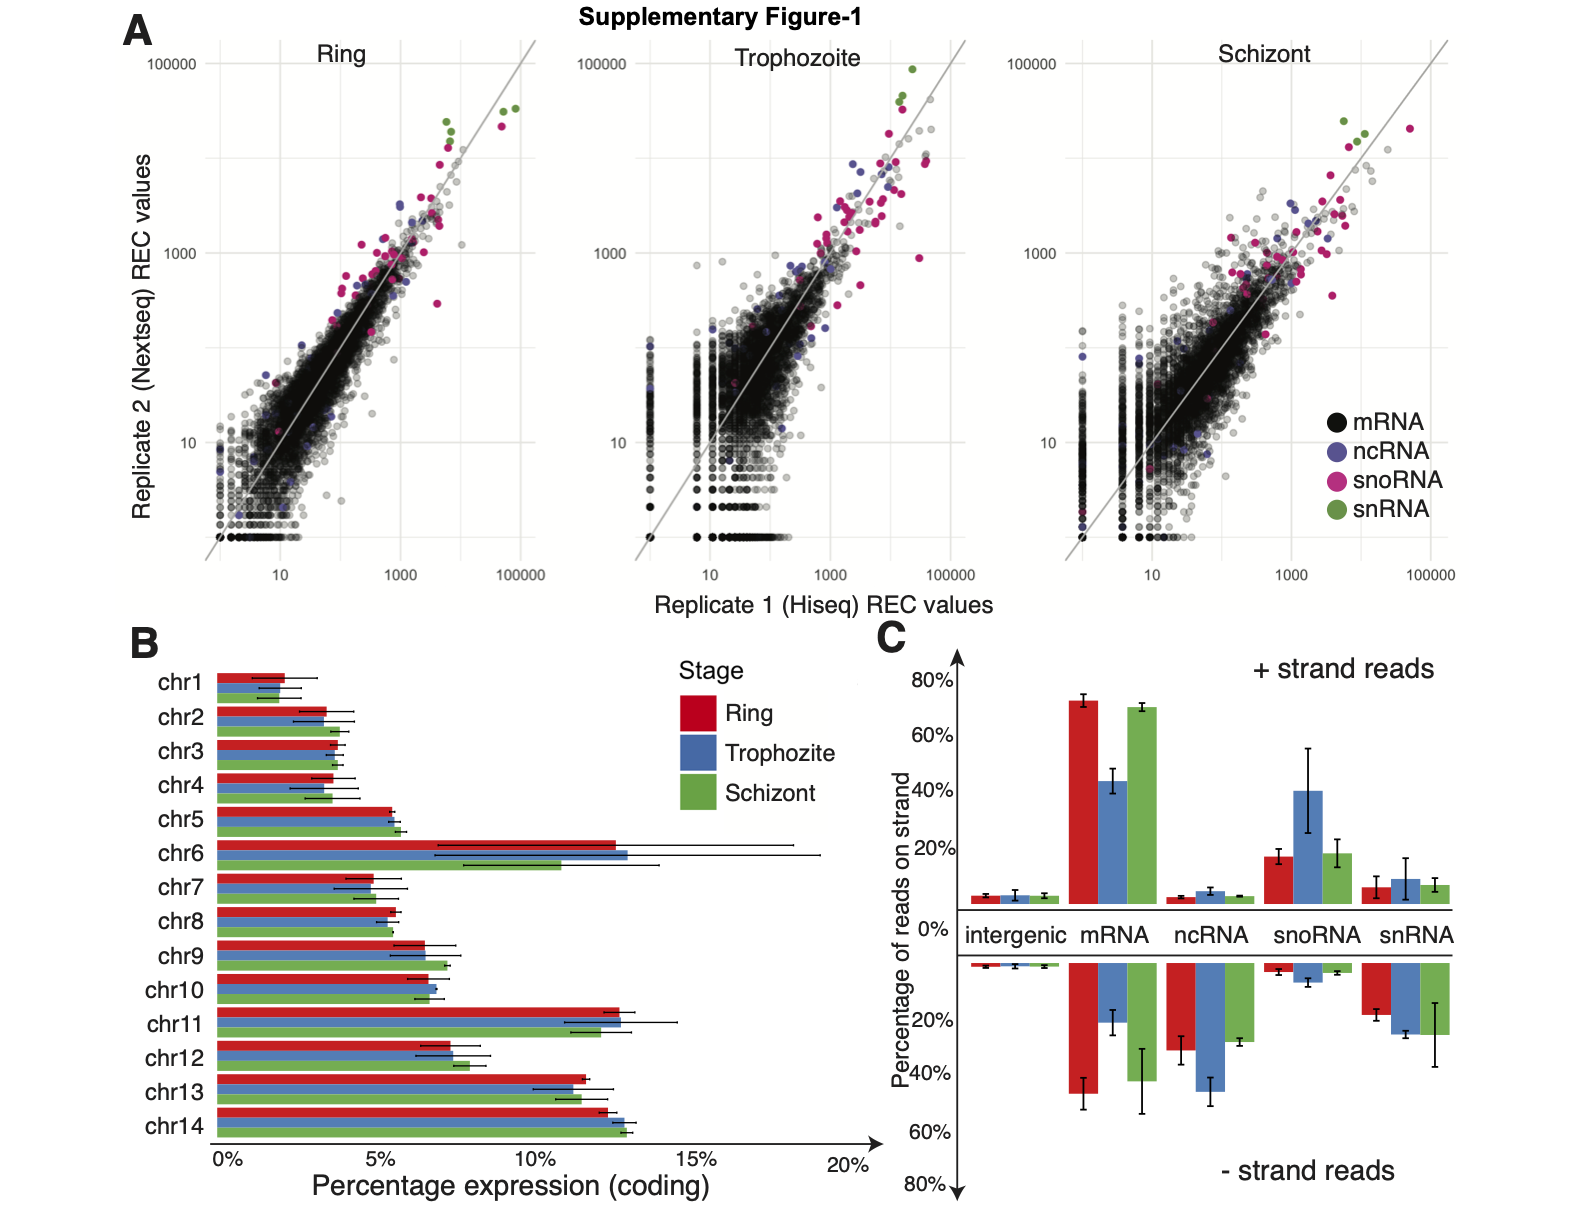

Supplement: Supplementary file 1 [file 1 › Figure S1(TIFF).tiff]

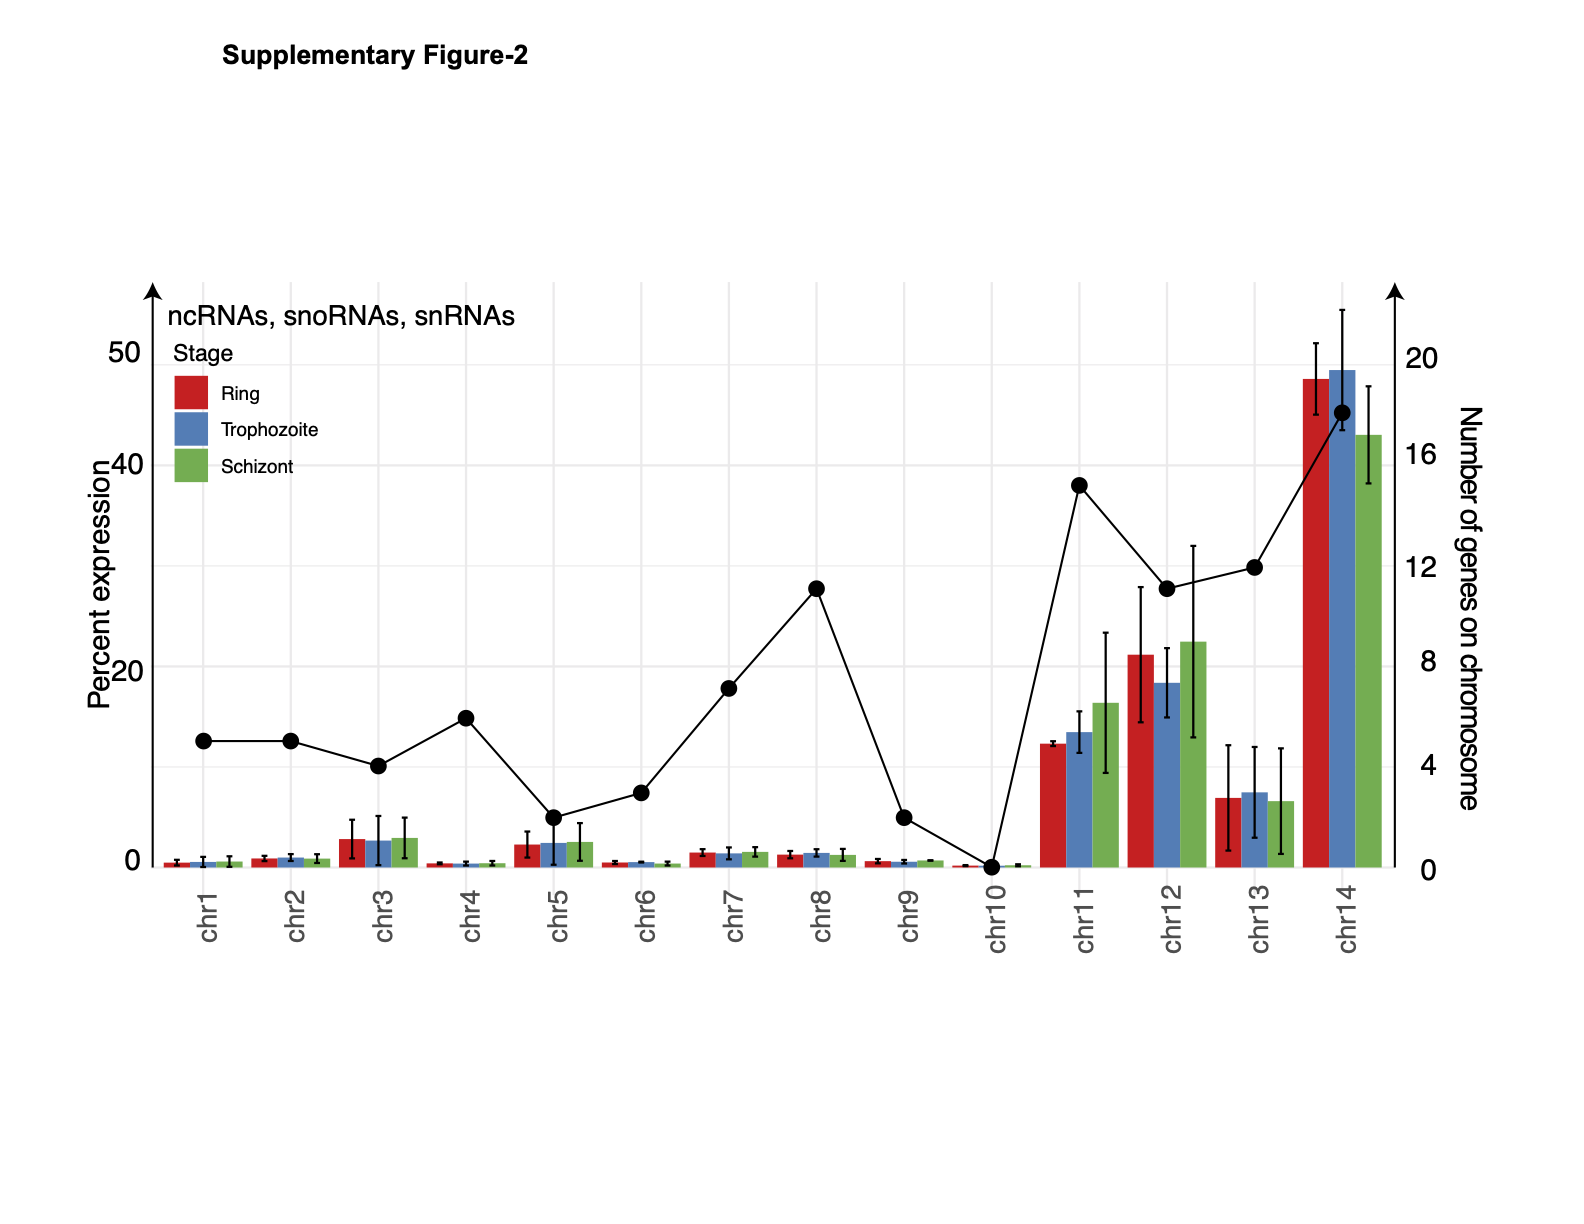

Supplement: Supplementary file 1 [file 1 › Figure S2(TIFF).tiff]

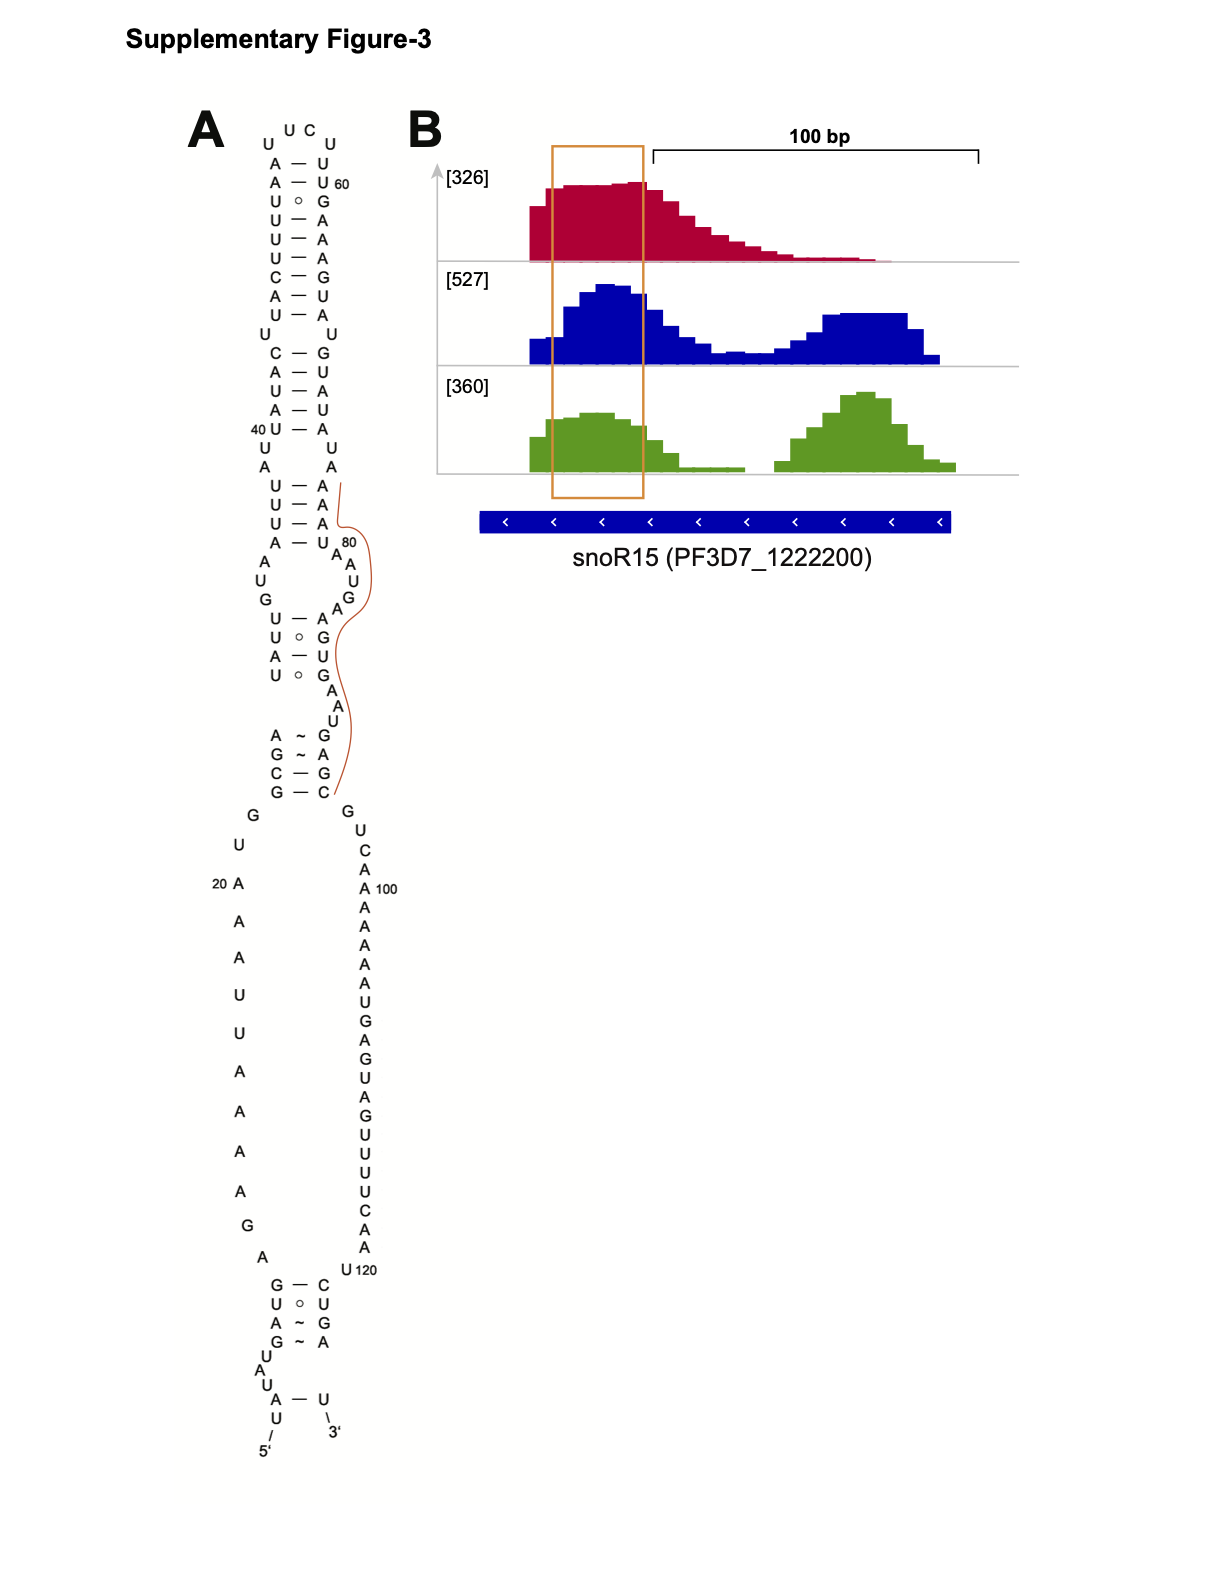

Supplement: Supplementary file 1 [file 1 › Figure S3(TIFF).tiff]

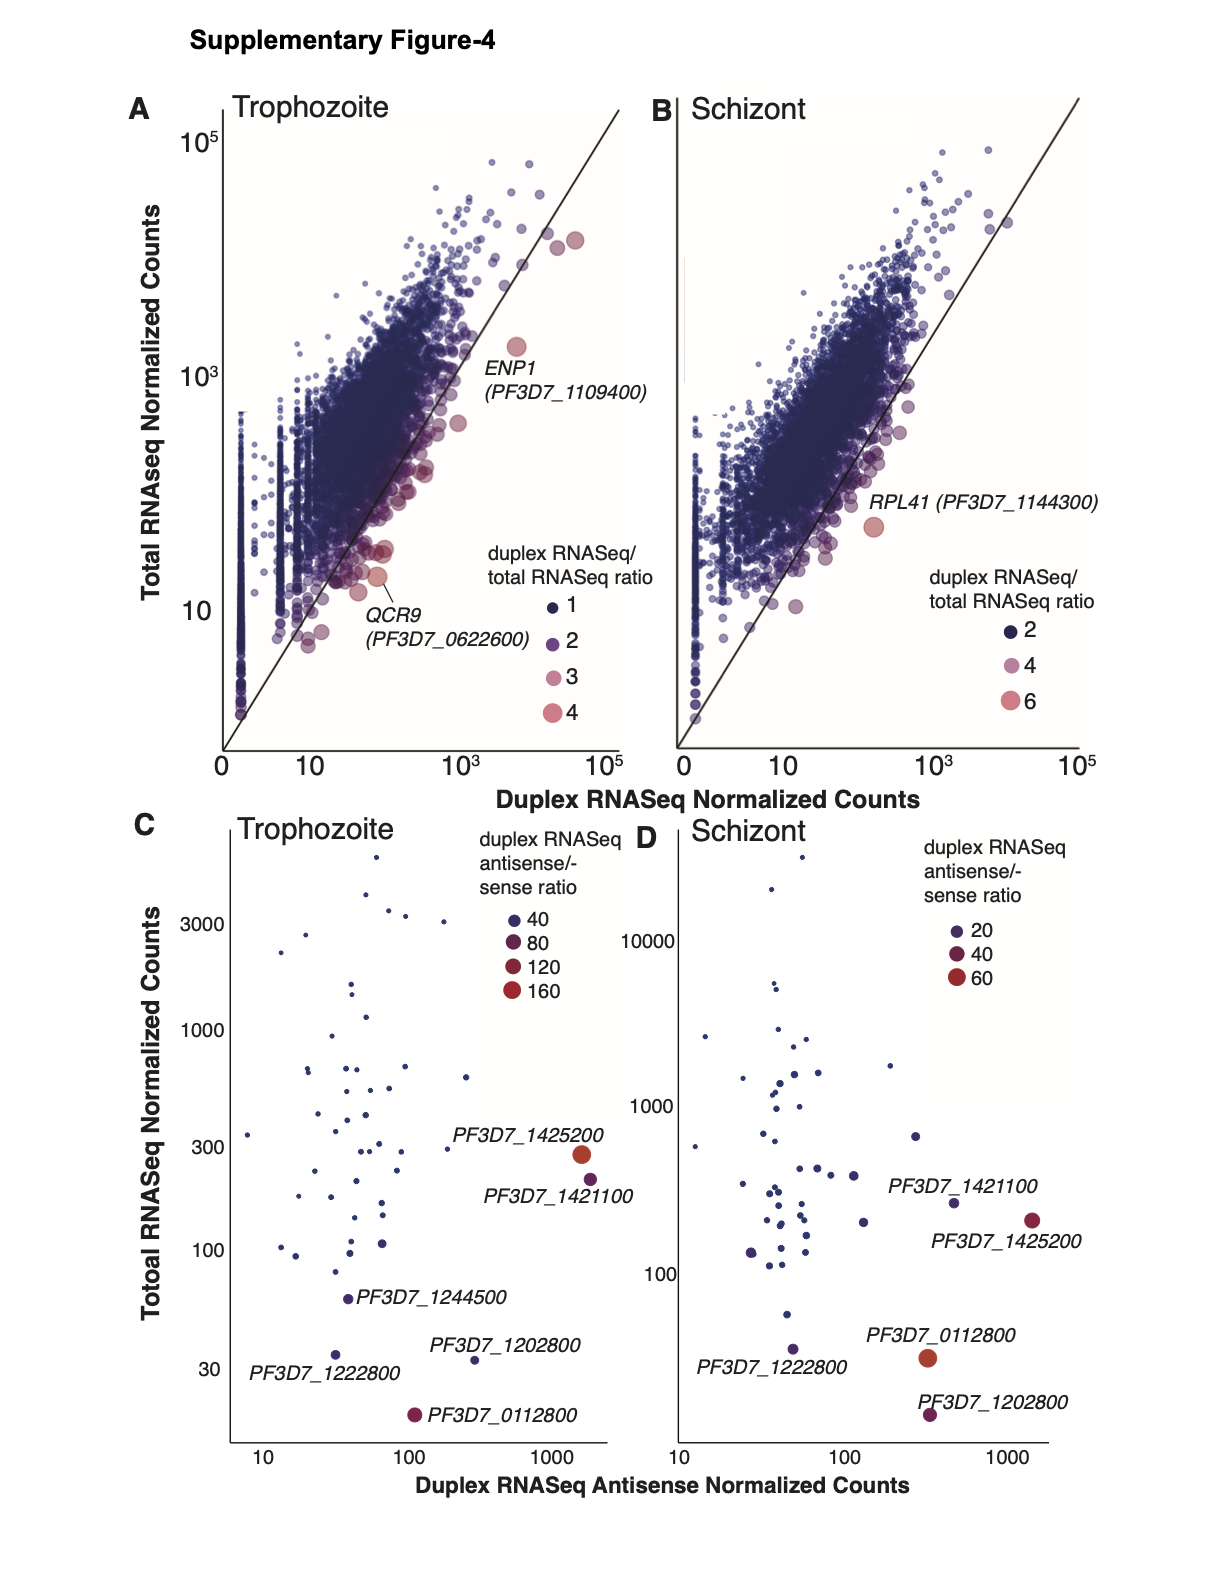

Supplement: Supplementary file 1 [file 1 › Figure S4(TIFF).tiff]

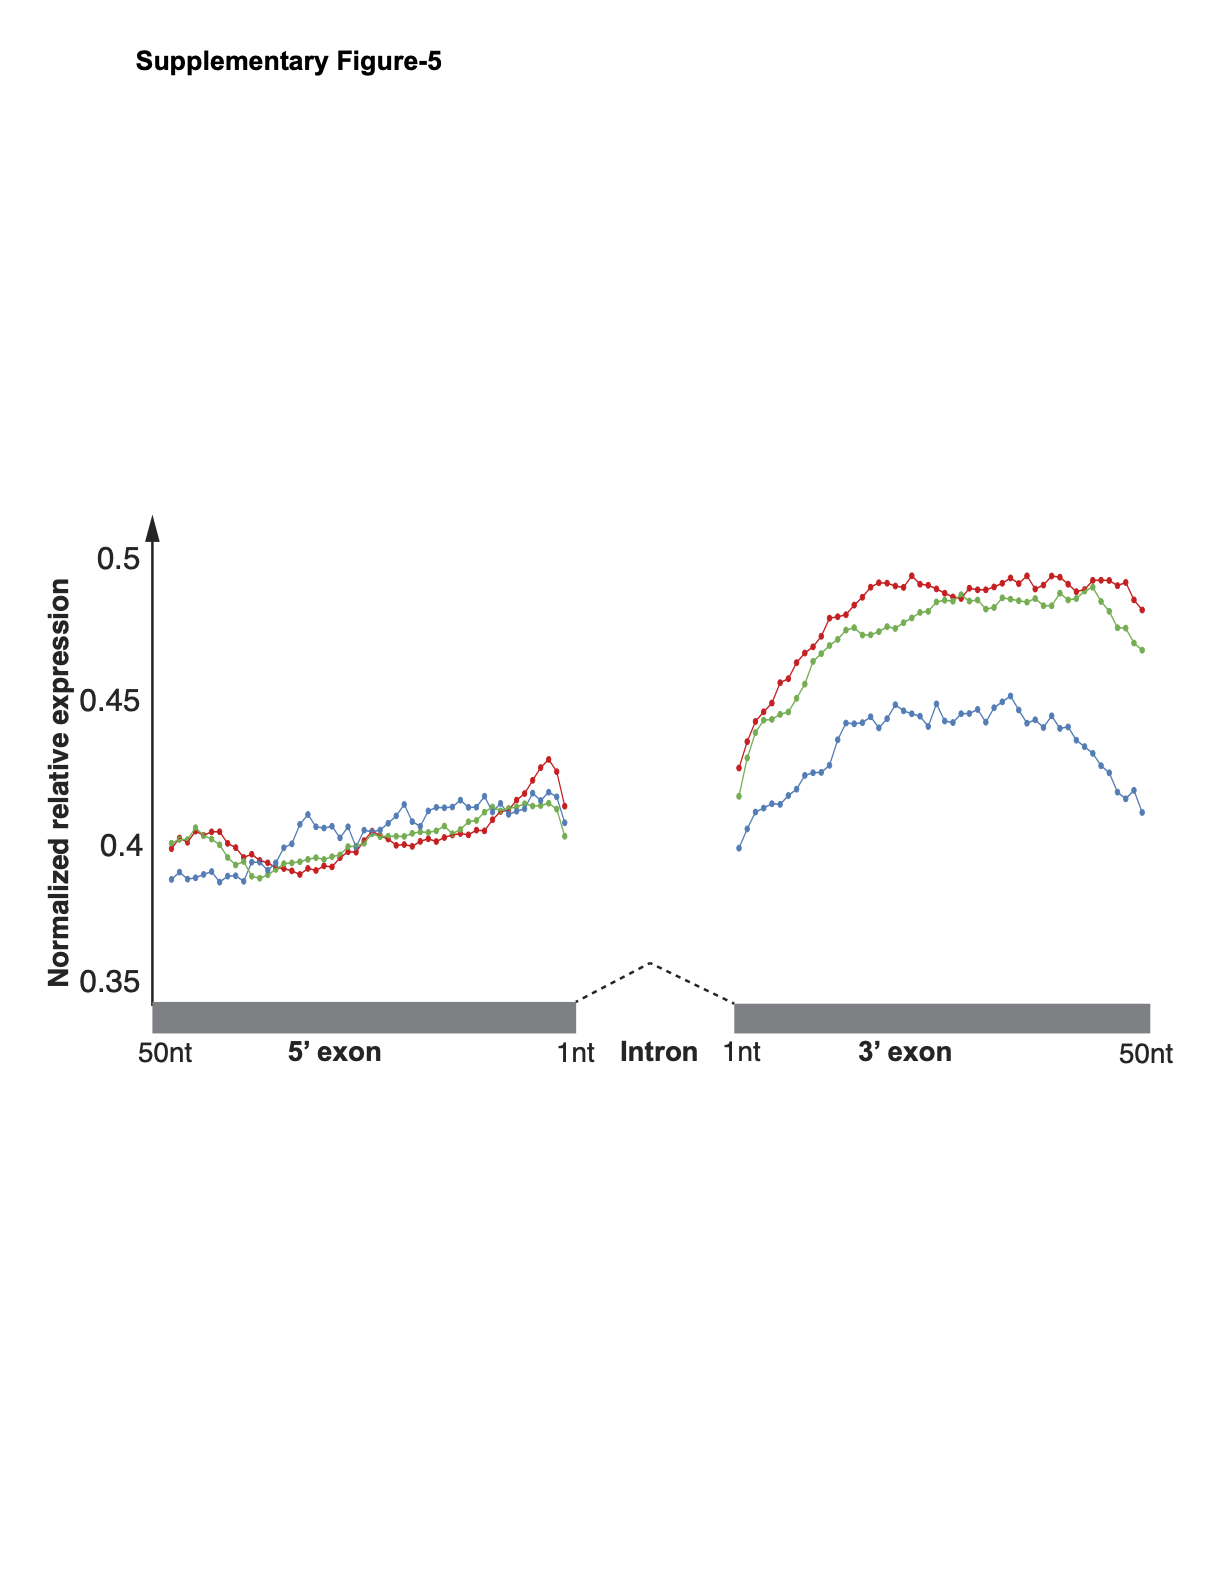

Supplement: Supplementary file 1 [file 1 › Figure S5(TIFF).tiff]
